# Supplementary material for: Malic Enzyme 1 (ME1) is pro-oncogenic in ApcMin/+ mice
Source: PubMed Central journal article supplement (PMC6155149; doi:10.1038/s41598-018-32532-w), 2018-09-24
Supplement: 41598_2018_32532_MOESM1_ESM.pdf [file 41598_2018_32532_MOESM1_ESM.pdf]

## **Malic Enzyme 1 (ME1) is pro-oncogenic in Apc<sup>Min/+</sup> mice**

Lorenzo M. Fernandes<sup>1,2</sup>, Ahmed Al-Dwairi<sup>2</sup>, Rosalia C.M Simmen<sup>1,2,3</sup>, Meera Marji<sup>2</sup>,  
Dustin M. Brown<sup>2</sup>, Sarah W. Jewell<sup>3</sup> & Frank A. Simmen<sup>1,2,3\*</sup>

### **Supplemental Information**

# Supplementary Figure 1

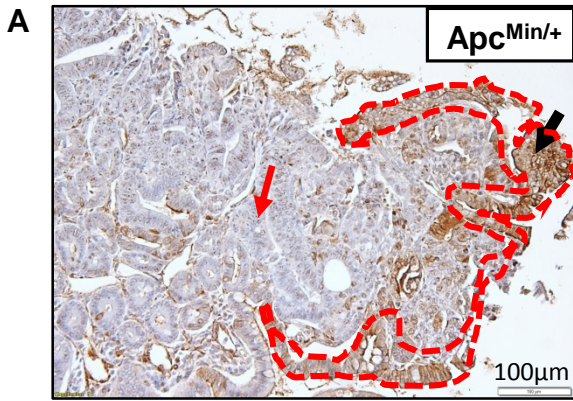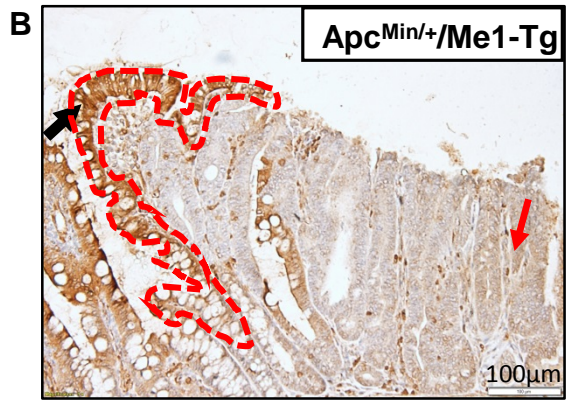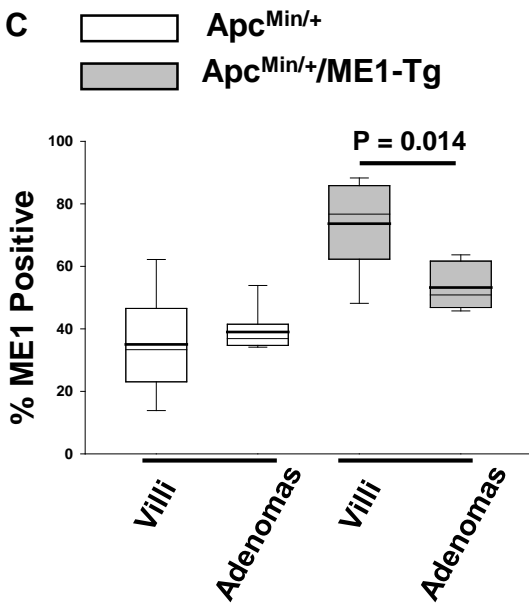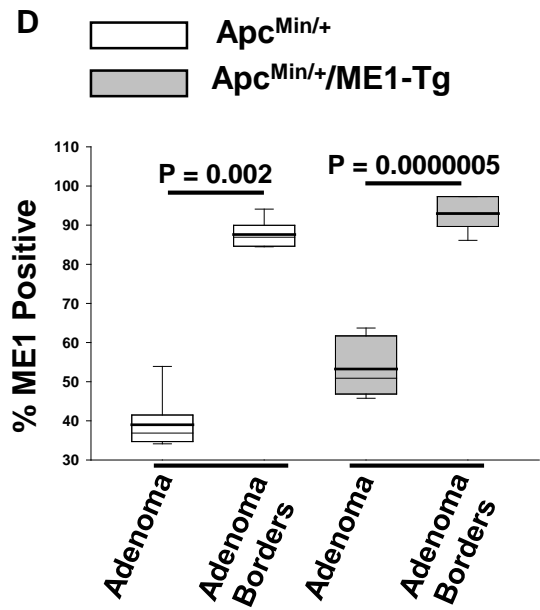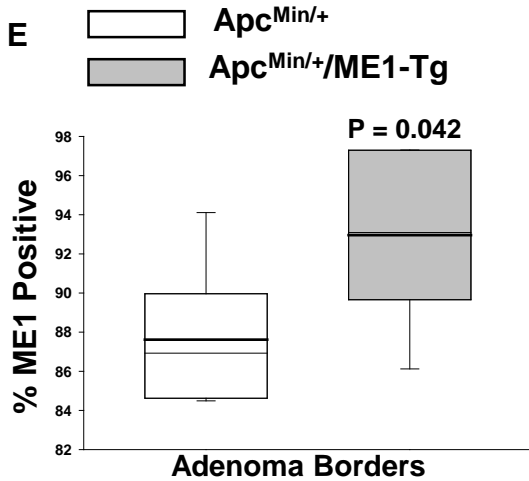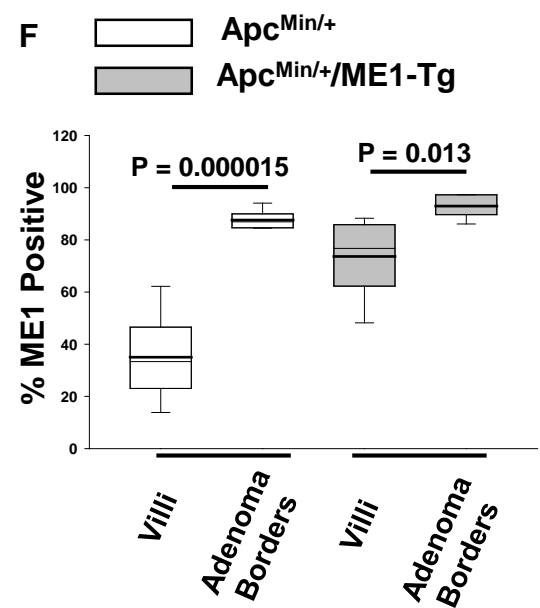

**Supplementary Figure 1.** Adenoma borders display relatively high levels of ME1. **(A, B)** ME1 IHC of ileal adenomas (borders outlined in red) from male mice (scale bar=100  $\mu\text{m}$ ). Red arrows point to centers of adenomas, whereas black arrows indicate intensely stained regions at the borders. **(C)** Comparison of percentage ME1-positivity between villi (epithelium plus *lamina propria*) and adenomas (excluding adenoma borders) of male mice. **(D)** Comparison of percentage ME1-positivity in adenomas vs. adenoma borders of male mice. **(E)** Comparison of percentage ME1-positivity in adenoma borders of male mice. **(F)** Comparison of percentage ME1-positivity between villi (epithelium including *lamina propria*) and adenoma borders of mice. Quantification was via Aperio Imagescope. Data are presented as boxes (inter-quartile range of 25-75%) with mean (thick line) and median (thin line); whiskers: 10<sup>th</sup> and 90<sup>th</sup> percentiles (n=6 mice/group). Student's *t*-tests were used to examine for differences in ME1 IHC staining and the Mann-Whitney Rank Sum Test was used for comparing non-normally distributed data.

# Supplementary Figure 2

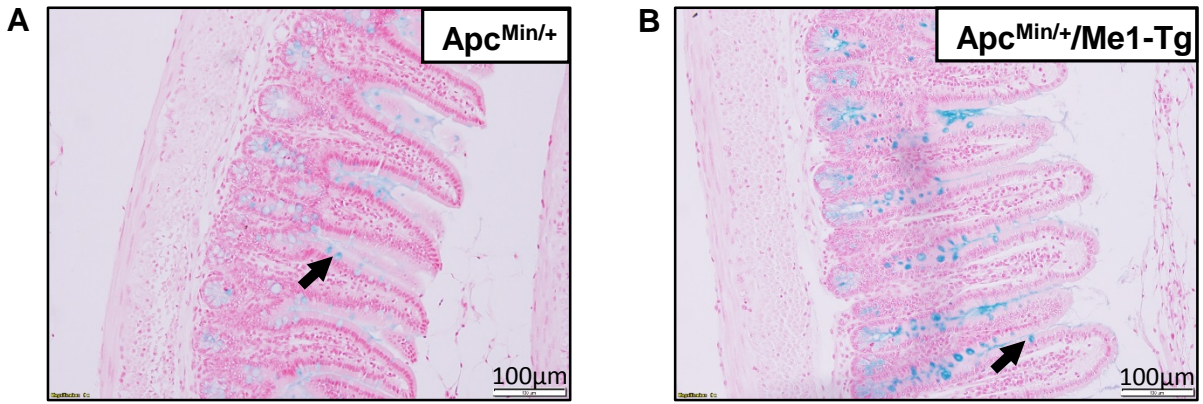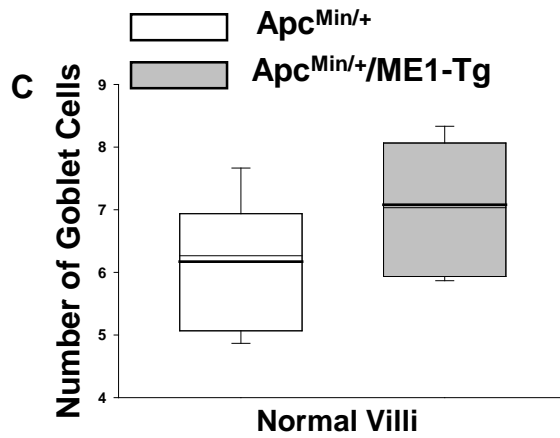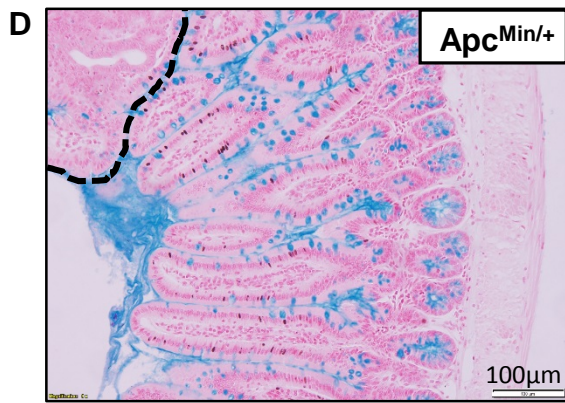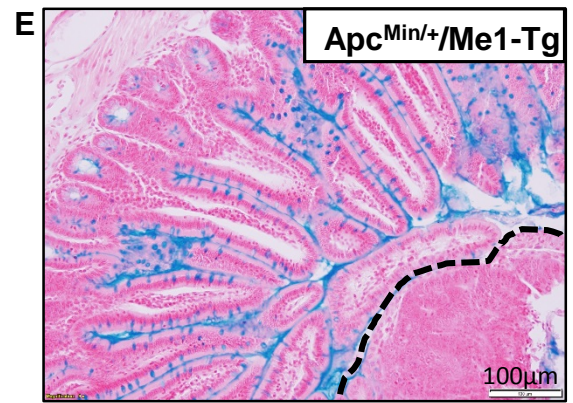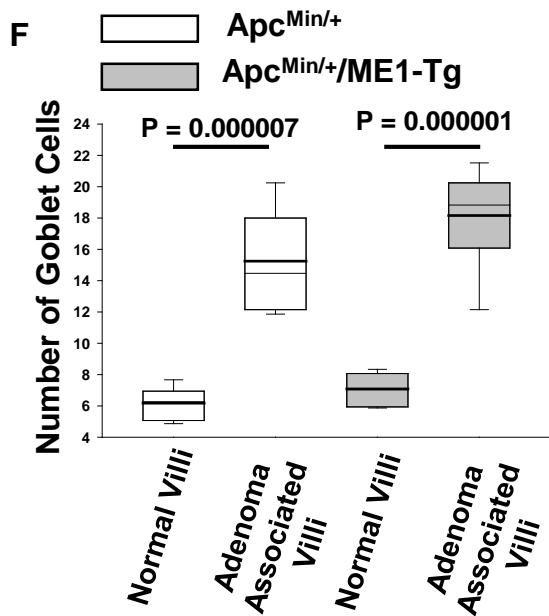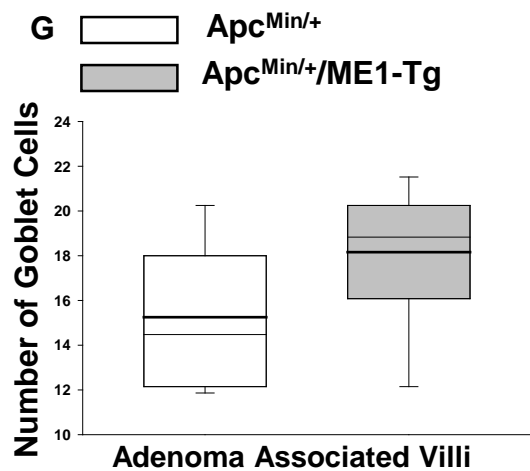

**Supplementary Figure 2.** Adenoma-associated villi have a higher density of goblet cells. **(A, B)** Alcian blue-stained villi of  $Apc^{Min/+}$  and  $Apc^{Min/+}/ME1-Tg$  male mice (scale bar=100  $\mu m$ ). Black arrows indicate representative goblet cells. **(C)** Number of goblet cells/villus within normal appearing villi of male mice. **(D, E)** Alcian blue-stained ileal adenoma-associated villi (scale bar=100  $\mu m$ ). Black dotted lines delineate borders of associated adenomas. **(F)** Number of goblet cells/villus in normal villi and adenoma-associated villi of male mice. **(G)** Number of goblet cells/villus within the adenoma-associated villi of male mice. Goblet cells were counted in blinded fashion. Boxes show the inter-quartile range (25-75%) with mean (thick line) and median (thin line); whiskers: 10<sup>th</sup> and 90<sup>th</sup> percentiles (n=7 mice/group). Student's t-tests were used to examine for differences between groups. Significant differences at  $P < 0.05$ .



# Supplementary Figure 3

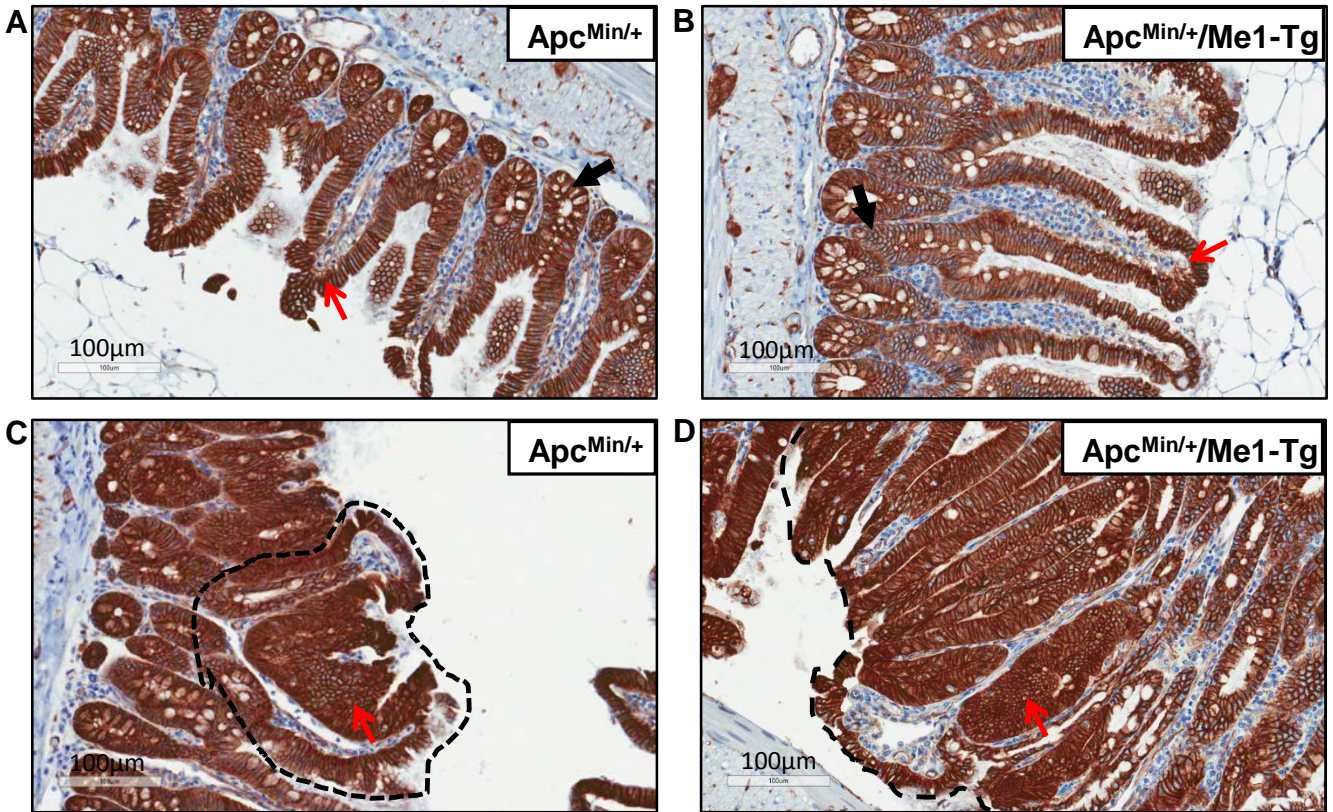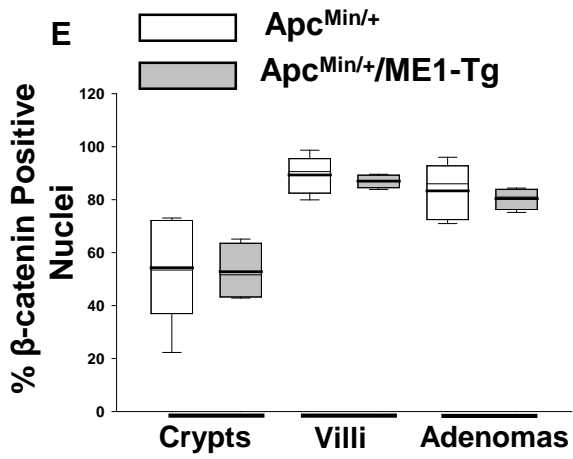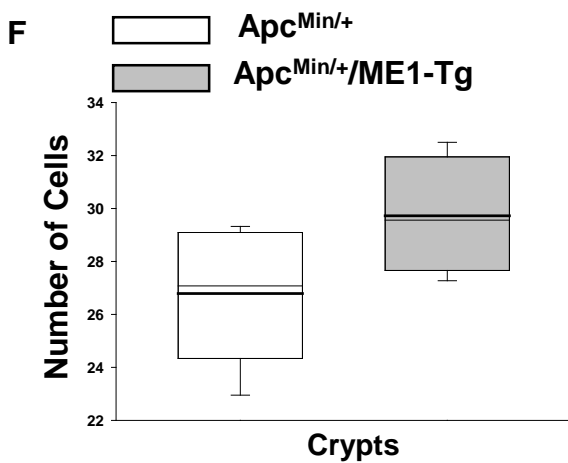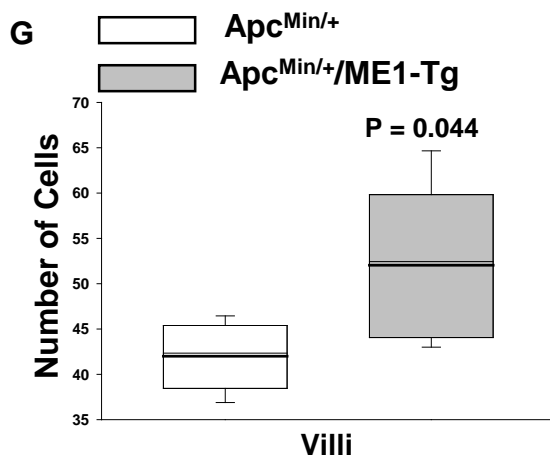

**Supplementary Figure 3.** IHC for  $\beta$ -catenin in crypts and villi (**A, B**) and adenomas (**C, D**) of  $Apc^{Min/+}$  and  $Apc^{Min/+}/ME1-Tg$  male mice (scale bar=100  $\mu$ m). Red arrows indicate villi and black arrows indicate crypts (**A, B**). Red arrows indicate centers of adenomas (**C, D**). (**E**) Quantification of nuclear  $\beta$ -catenin positive cells in crypt villi and adenomas. Number of cells comprising one side of crypts (**F**) and villi (**G**) of Swiss-rolled ilea from  $Apc^{Min/+}$  and  $Apc^{Min/+}/ME1-Tg$  male mice. Boxes indicate the inter-quartile range of 25-75% with mean (thick line) and median (thin line); whiskers: 10<sup>th</sup> and 90<sup>th</sup> percentiles; n=4-5 mice/group. Student's t-tests were used to compare differences between groups. Significant differences were identified by  $P < 0.05$ .

# Supplementary Figure 4

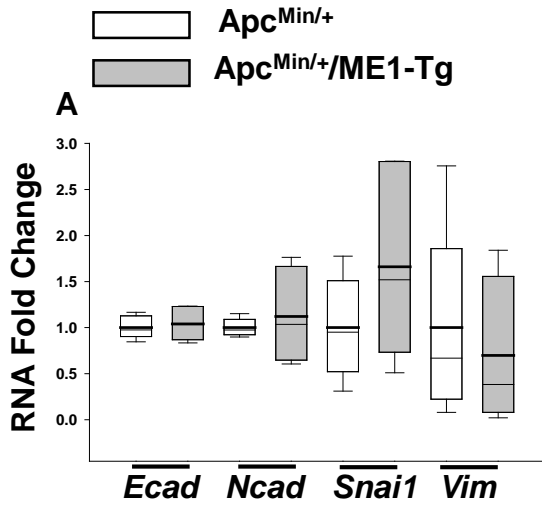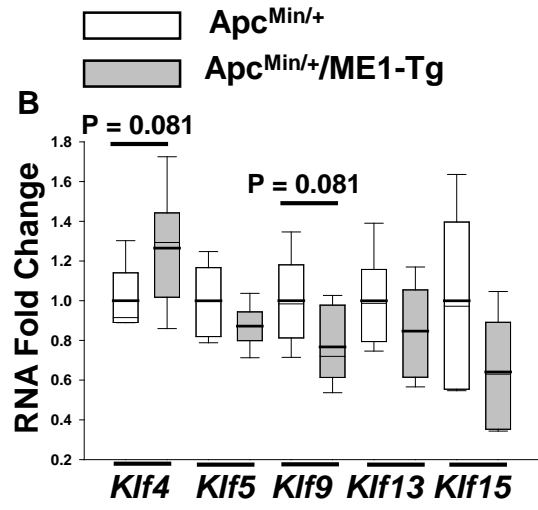



**Supplementary Figure 4.** Mouse intestine gene expression. **(A)** RNA fold changes for epithelial to mesenchymal transition (EMT)-associated genes in the jejunums from male  $Apc^{Min/+}$  and  $Apc^{Min/+}/ME1-Tg$  mice (n=5-6/group). **(B)** RNA fold changes for *Klf/Sp* family members in jejunums from male  $Apc^{Min/+}$  and  $Apc^{Min/+}/ME1-Tg$  mice (n=6/group). Boxes indicate the inter-quartile range of 25-75%, with mean (thick line) and median (thin line); whiskers: 10<sup>th</sup> and 90<sup>th</sup> percentiles. Student's *t*-tests were used to examine for differences between groups (none found). Tendencies for differences are indicated (0.1>P>0.05).

# Supplementary Figure 5

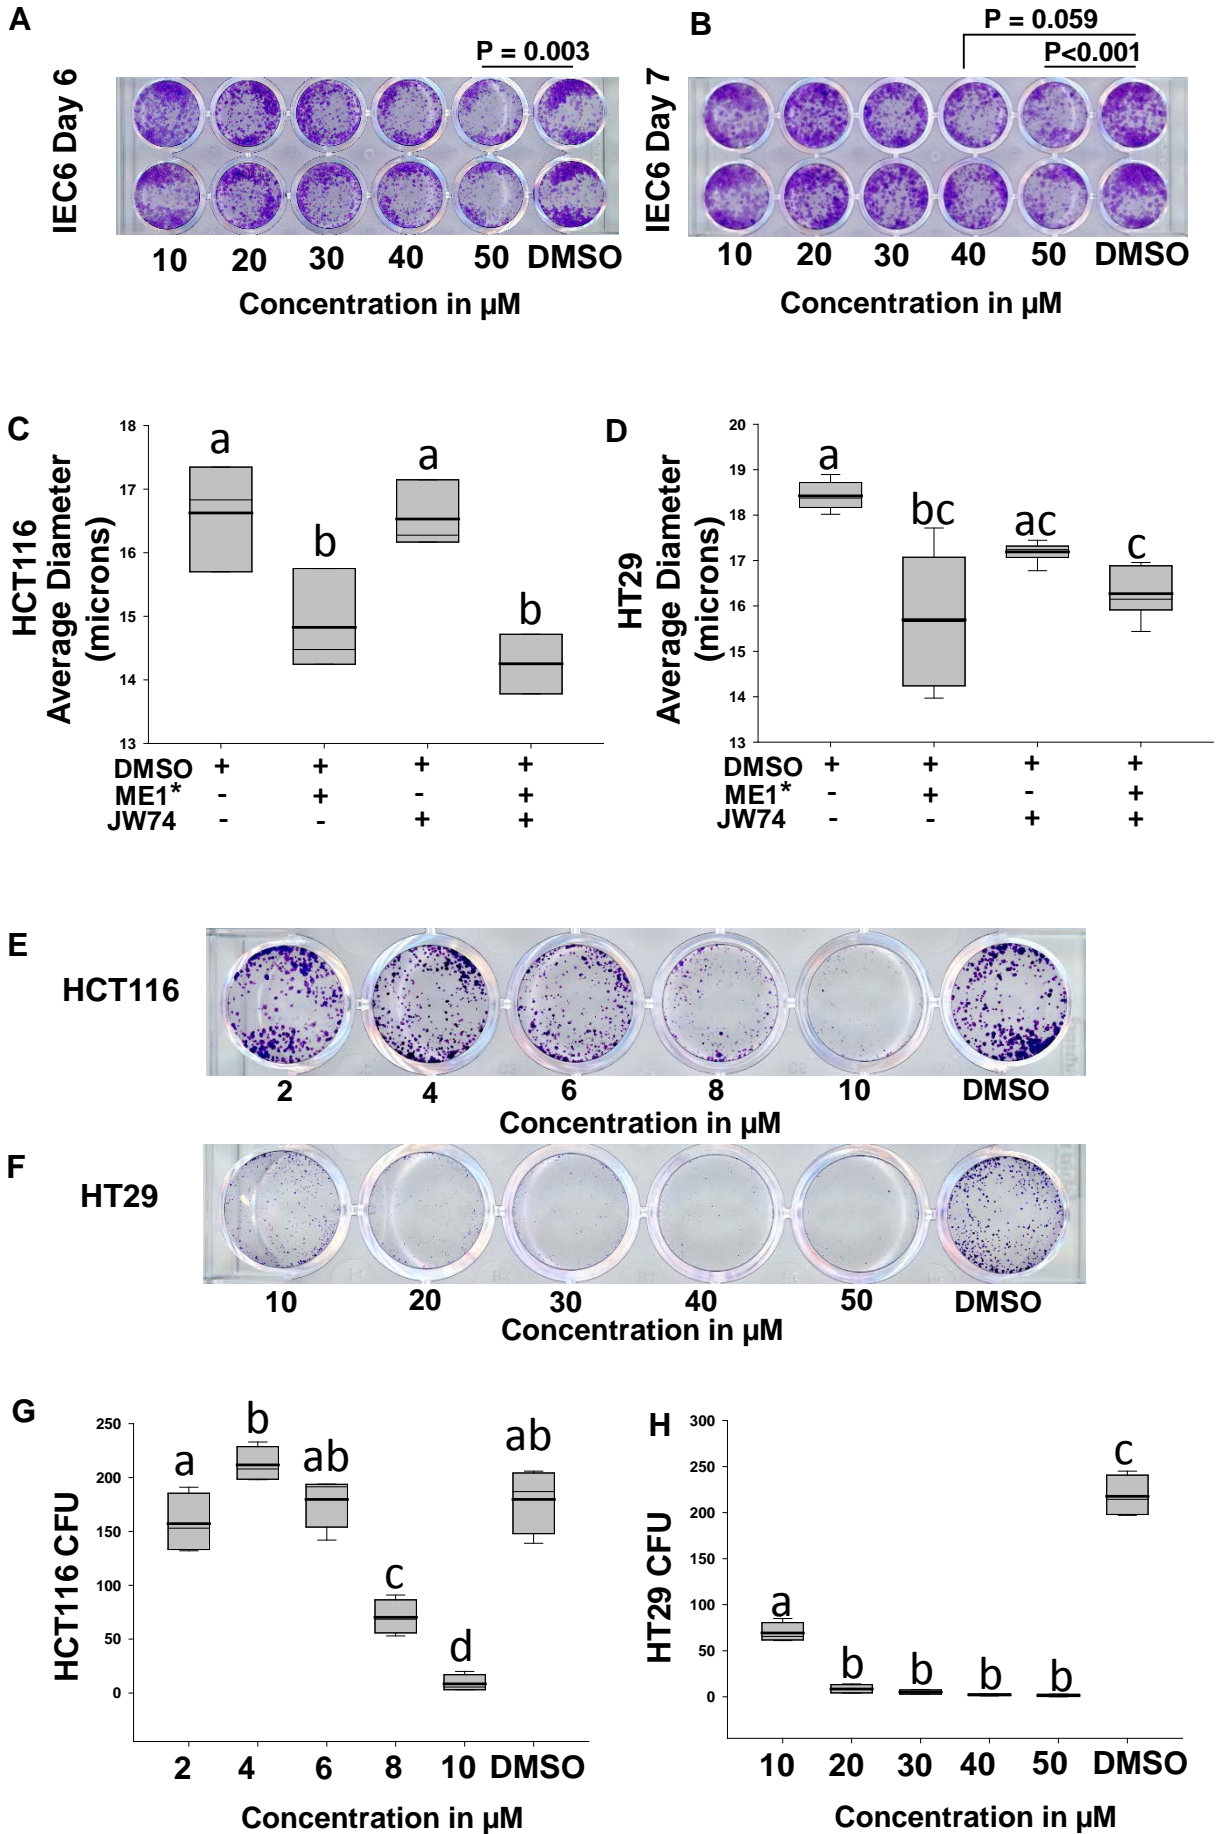

**Supplementary Figure 5.** (A, B) Clonogenic assay of IEC6 cells (A: after six days; B: after 7 days). (C, D) Quantitation of cell diameters after treatment with 50uM ME1\*, 15 uM JW74, 50uM ME1\* plus 15uM JW74, or vehicle (DMSO). Twenty thousand cells were plated in each well; after 24 h, cells were treated with inhibitors, and after 72 h of treatment were sized (n=3-6 wells/treatment group, 2 independent experiments). (E) HCT116 colonies in clonogenic assay. Cells were plated (1000 cells/well) and after 24 h were treated with varying doses of ME1\* or vehicle (DMSO), incubated for six days, followed by crystal violet staining. (F) HT29 colonies in clonogenic assay. Cells were plated (1000 cells/well) and after 24 h were treated with various doses of ME1\* or vehicle (DMSO), incubated for six days, followed by crystal violet staining. (G, H) Quantitation of HCT116 and HT29 colony forming units (CFU) (n=4 well/treatment dose). Boxes indicate the inter-quartile range of 25-75% with mean (thick line) and median (thin line); whiskers: 10<sup>th</sup> and 90<sup>th</sup> percentiles. One way ANOVA was used to compare differences between treatment groups. Different lowercase letters (a, b) designate groups significantly different from each other (P<0.05); bars sharing the same letter are not significantly different from each other.



## Supplementary Figure 6

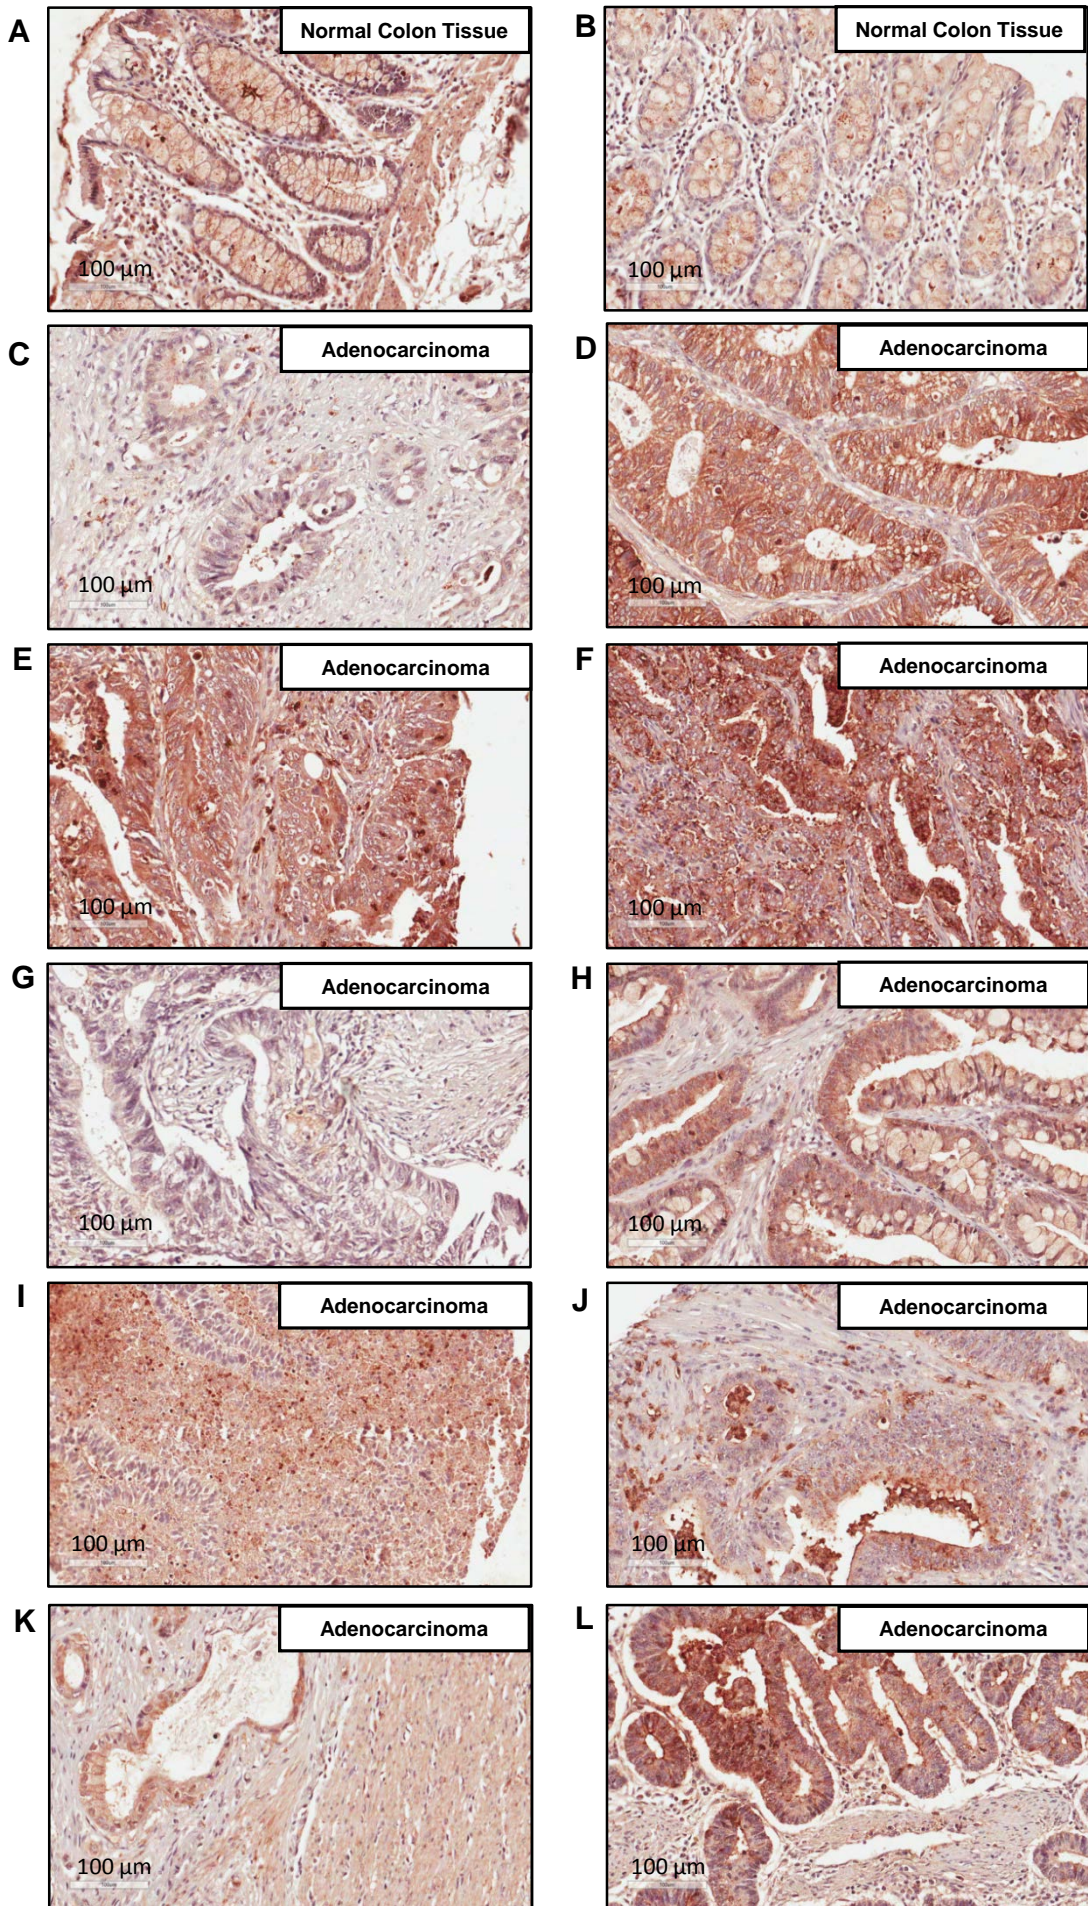

**Supplementary Figure 6.** ME1-IHC of normal human colon and human colon carcinoma tissues. **(A, B)** Normal colon tissue. **(C)** Stage I, adenocarcinoma. **(D)** Stage II, adenocarcinoma. **(E)** Stage III, adenocarcinoma. **(F)** Stage III, adenocarcinoma. **(G)** Stage IV, adenocarcinoma. **(H)** Stage II, mucinous adenocarcinoma. **(I)** Stage III, adenocarcinoma (smooth muscle and necrotic tissue). **(J)** Stage III, adenocarcinoma (chronic inflammation of smooth muscle). **(K)** Stage II, adenocarcinoma (smooth muscle). **(L)** Stage II, adenocarcinoma. (scale bars=100 um).

Supplementary Figure 7

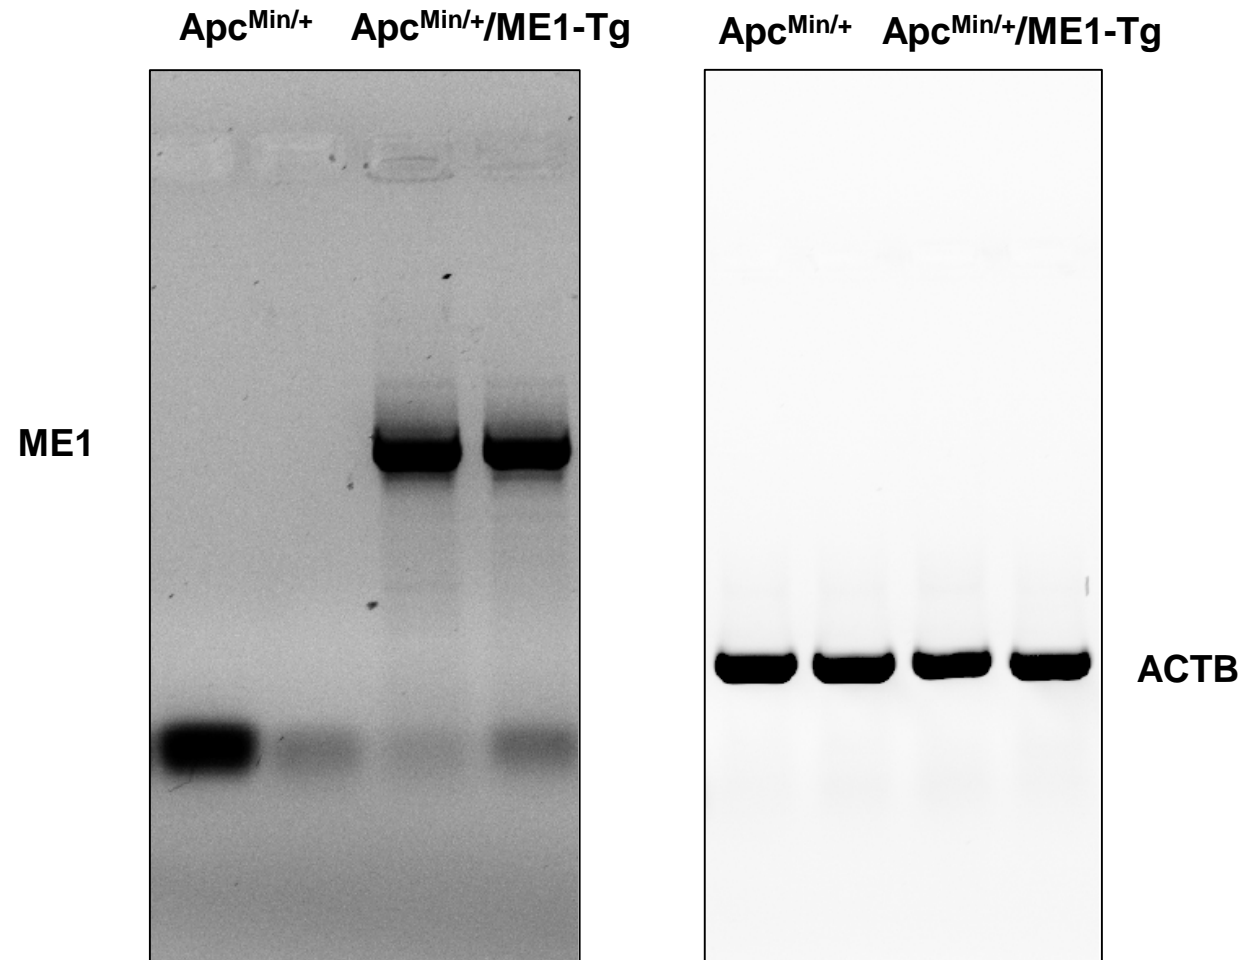

Supplementary Figure 7. Full-length gels for Figure 1C.
